# Supplementary material
Source: PubMed Central journal article supplement (PMC8642306)

**Supplemental Table 1. Baseline Characteristics by SNX-5422 Dose**

| Characteristic                      | 50 mg/m <sup>2</sup><br>N=3 | 75 mg/m <sup>2</sup><br>N=4 | 100 mg/m <sup>2</sup><br>N=16 | Total<br>N=23 |
|-------------------------------------|-----------------------------|-----------------------------|-------------------------------|---------------|
| Sex, n (%)                          |                             |                             |                               |               |
| Male                                | 1 (33)                      | 4 (100)                     | 9 (56)                        | 14 (61)       |
| Female                              | 2 (67)                      | 0                           | 7 (44)                        | 9 (39)        |
| Race/Ethnicity, n (%)               |                             |                             |                               |               |
| Caucasian                           | 3 (100)                     | 4 (100)                     | 10 (63)                       | 17 (74)       |
| Black                               | 0                           | 0                           | 5 (31)                        | 5 (22)        |
| Asian                               | 0                           | 0                           | 1 (6)                         | 1 (4)         |
| Hispanic or Latino                  | 1 (33)                      | 0                           | 0                             | 1(4)          |
| Age (years)                         |                             |                             |                               |               |
| Mean (SD)                           | 58 (10)                     | 60 (9)                      | 59 (9)                        | 59 (8)        |
| >65 years                           | 1 (33)                      | 1 (25)                      | 4 (25)                        | 6 (26)        |
| Height, mean (SD), cm               | 166 (8)                     | 178 (5)                     | 170 (10)                      | 171 (10)      |
| Weight, mean (SD), kg               | 74 (18)                     | 82 (13)                     | 75 (16)                       | 76 (15)       |
| BMI, mean (SD), kg/m <sup>2</sup>   | 27 (4)                      | 26 (3)                      | 26 (5)                        | 26 (5)        |
| Diagnosis, n (%)                    |                             |                             |                               |               |
| NSCLC <sup>1</sup>                  | 2 (67)                      | 3 (75)                      | 15 (88)                       | 20 (87)       |
| SCLC <sup>2</sup>                   | 1 (33)                      | 1 (25)                      | 1 (6)                         | 3 (13)        |
| Prior Regimens <sup>3</sup> , n (%) |                             |                             |                               |               |
| 0                                   | 1 (33)                      | 2 (50)                      | 6 (38)                        | 9 (39)        |
| 1                                   | 2 (67)                      | 2 (50)                      | 5 (31)                        | 9 (39)        |
| 2                                   | 0                           | 0                           | 3 (19)                        | 3 (13)        |
| ≥3                                  | 0                           | 0                           | 2 (13)                        | 2 (9)         |

<sup>1</sup> All patients had *EGFR* wild-type NSCLC, except 1 whose tumor harbored an *EGFR* exon 20 insertion. There were also 2 patients with a *KRAS* mutation and 1 each with a *BRAF* mutation, *HER2* mutation, and *RET*-fusion.

<sup>3</sup> Prior systemic anticancer therapy, including adjuvant therapy, but not including radiation therapy.

**Supplemental Table 2. Summary of Mean ( $\pm$ SD) SNX-2112 Pharmacokinetic Parameters on Day 3 of Cycle 1**

| Parameter                        | 50 mg/m <sup>2</sup> (N=3) | 75 mg/m <sup>2</sup> (N=3)   | 100 mg/m <sup>2</sup> (N=6)   |
|----------------------------------|----------------------------|------------------------------|-------------------------------|
| T <sub>max</sub> (hr)*           | 1.3 $\pm$ 0.6              | 4.0 $\pm$ 0.0                | 2.0 (1.0 - 2.2)               |
| C <sub>max</sub> (ng/mL)         | 714 $\pm$ 280              | 910 $\pm$ 670                | 1420 $\pm$ 1240               |
| T <sub>1/2</sub> (hr)            | 8.21 $\pm$ 0.42            | N/A <sup>a</sup>             | 8.03 $\pm$ 1.04               |
| T <sub>last</sub> (hr)           | 24.3 $\pm$ 1.9             | 24.6 $\pm$ 1.6               | 18.9 $\pm$ 8.5                |
| AUC <sub>0-last</sub> (hr·ng/mL) | 2750 $\pm$ 636             | 7640 $\pm$ 5570              | 8830 $\pm$ 8090               |
| AUC <sub>0-24</sub> (hr·ng/mL)   | 2730 $\pm$ 581             | 5110 $\pm$ 4960 <sup>b</sup> | 10300 $\pm$ 9890 <sup>c</sup> |
| CL/F <sub>m</sub> (L/hr)         | 27.2 $\pm$ 3.6             | N/A <sup>a</sup>             | 23.6 $\pm$ 14.6 <sup>c</sup>  |
| Vz/F <sub>m</sub> (L)            | 322 $\pm$ 45               | N/A <sup>a</sup>             | 270 $\pm$ 181 <sup>c</sup>    |

\* Mean ( $\pm$ SD) reported for T<sub>max</sub> for cohorts 1 and 2; median and (range) reported for Cohort 3

<sup>a</sup> Elimination rate constant could not be determined for any subject in this cohort.

<sup>b</sup> N=2.

<sup>c</sup> N=4.

Supplemental Figure 1. Progression-Free Survival with SNX-5422 in NSCLCs

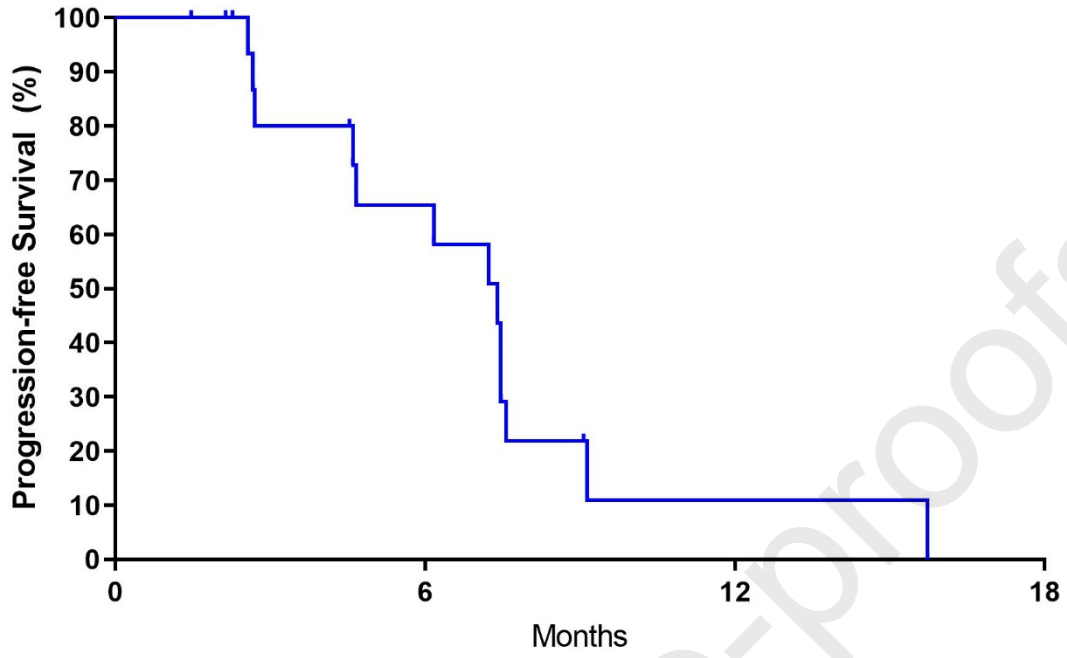

Supplement: NIHMS1748308-supplement-1.pdf [file NIHMS1748308-supplement-1.pdf]
